# Supplementary material for: PRIMA-1met induces autophagy in colorectal cancer cells through upregulation of the mTOR/AMPK-ULK1-Vps34 signaling cascade
Source: PubMed Central journal article supplement — Oncol Rep. 2021 Mar 31;45(5):86. doi: 10.3892/or.2021.8037 (PMC8025076; doi:10.3892/or.2021.8037), 2021-03-31

Data S1. To determine the dose of 3-methyladenine (3-MA) for inhibiting autophagy without obvious cytotoxicity in CRC cells, RKO cells were exposed to 3-MA alone or combined with 40  $\mu$ M PRIMA-1<sup>met</sup> for 48 h followed by a Cell Counting Kit-8 assay. The results showed that cell proliferation decreased after the treatment of 3-MA in a dose-dependent manner once over 800  $\mu$ M (Fig. S1). However, the western blotting results indicated that dosages lower than 800  $\mu$ M (200 and 400  $\mu$ M) for 3-MA had no effect on the expression

of LC3-II (The figures are not shown in the manuscript). To further make the working dose of 3-MA more reliable, a colony formation assay was performed in the HCT116<sup>wt</sup> cell line. Cell colonies were observed and counted following 10 days of treatment with PBS control or 3-MA at indicated dosages of 800 and 3000  $\mu$ M. As predicted, the number of colonies was significantly suppressed with 3-MA at the high dose of 3000  $\mu$ M compared to that observed in cells treated with PBS alone ( $P < 0.01$ ; Fig. S2).

Figure S1. RKO cells were treated with 40  $\mu$ M PRI and 3-MA at the indicated dosages alone or in combination for 48 h, followed by a Cell Counting Kit-8 assay. The percentage of cell proliferation was normalized with the respective PBS control. 3-MA alone suppressed cell proliferation once the dose was over 800  $\mu$ M. Treatment administered in combination resulted in a significant suppression to the effect of PRIMA-1<sup>met</sup> with the dosages of 3-MA from 100 to 800  $\mu$ M. Data were obtained from triplicate samples and assessed as the mean + SEM. 3-MA, 3-methyladenine; PRI, p53-reactivation and induction of massive apoptosis-1, APR-017 methylated.

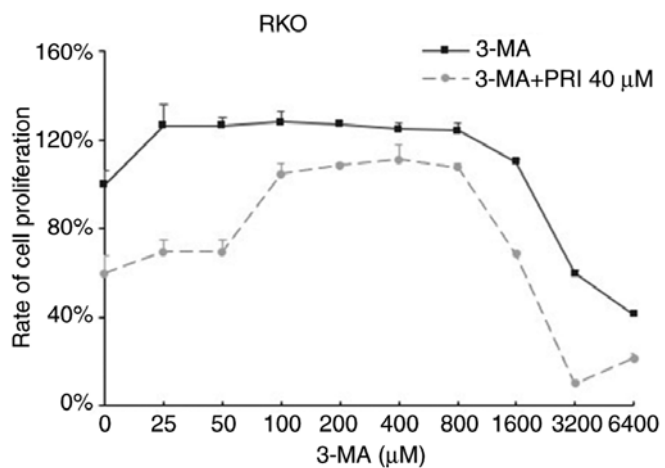

Figure S2. HCT116<sup>wt</sup> were seeded into 6-well plates in duplicate following treatment with PBS (ctrl) or 3-MA at indicated dosages of 800 and 3,000  $\mu\text{M}$  for 48 h. After 10 days, cell colonies were observed, imaged and analyzed using ImageJ version 1.8.0 software (National Institutes of Health). Data are presented as the mean + SEM (n=2). \*\*P<0.01, compared with the PBS-treated group (ctrl). 3-MA, 3-methyladenine.

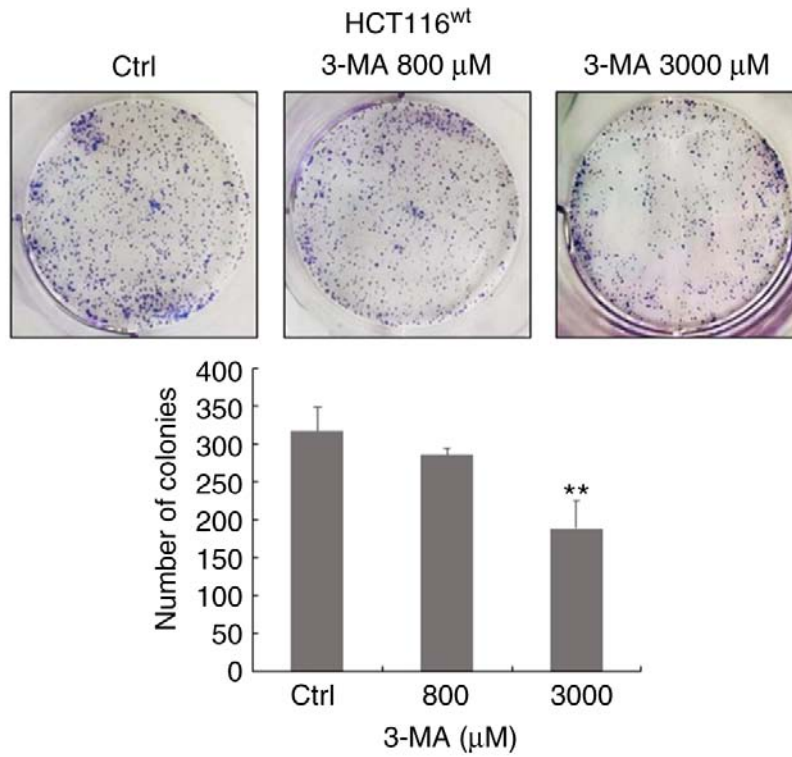

Supplement: Supplementary_Data.pdf [file Supplementary_Data.pdf]
